# Supplementary material for: Solvent- and concentration-induced self-assembly of an amphiphilic perylene dye
Source: Royal Society of Chemistry journal article supplement (doi:10.1039/c9nj05674b), 2019-12-19
Supplement: c9nj05674b1.pdf [file c9nj05674b1.pdf]

# Supporting Information

## Solvent- and concentration-induced self-assembly of an amphiphilic perylene dye

Antonella Caterina Boccia,<sup>a</sup> Vladimir Lukes<sup>b</sup> Anita Eckstein-Andicsovà,<sup>c</sup> and Erika Kozma<sup>a</sup>

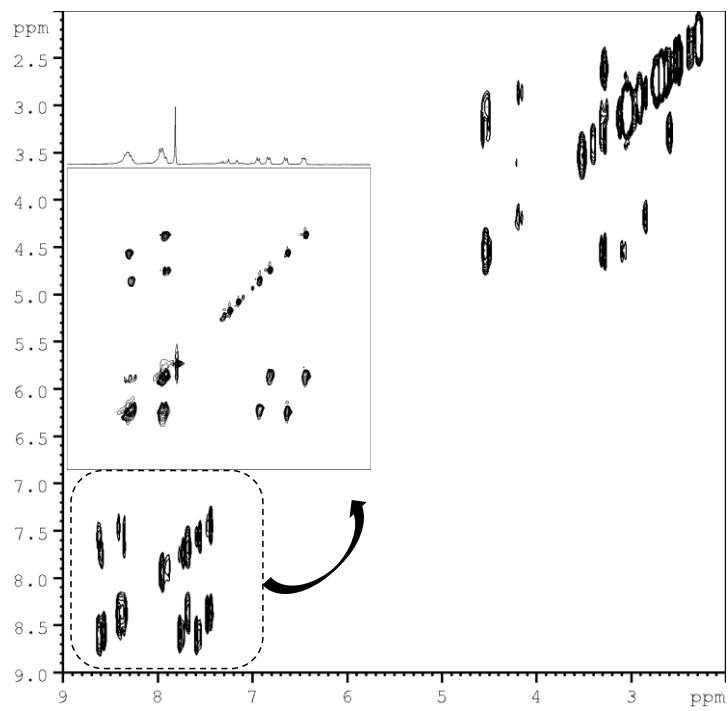

**Fig. S1 ESI.** 2D COSY spectrum of PDA-CA in DMSO,  $2.1 \cdot 10^{-2}$  M, 298 K

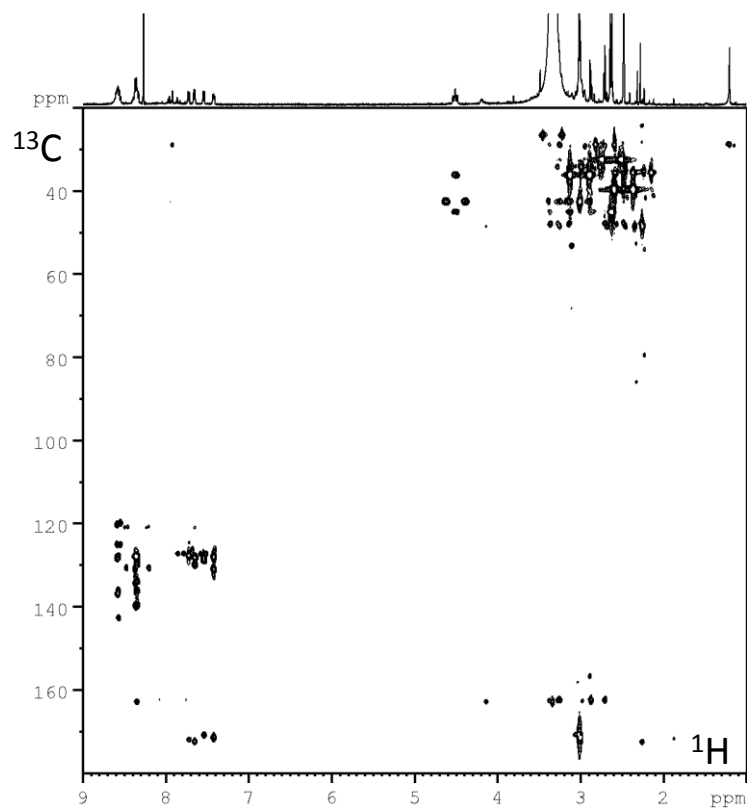

**Fig. S2 ESI.** HMBC spectrum of **PDA-CA** in DMSO,  $2.1 \cdot 10^{-2}$  M, 298 K

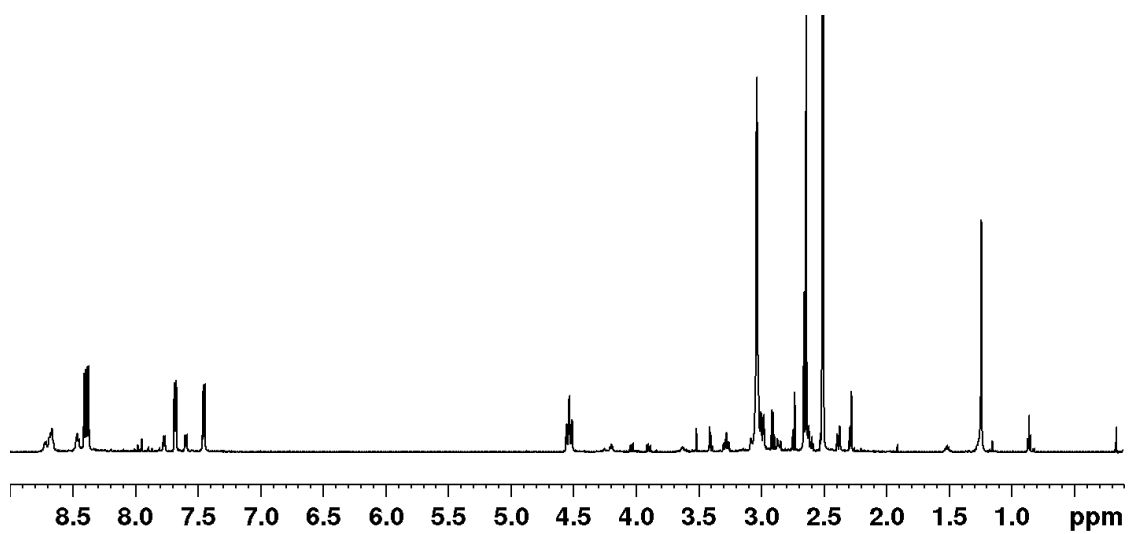

**Fig. S3 ESI.** <sup>1</sup>H NMR spectrum of **PDA-CA** in DMSO,  $2.1 \cdot 10^{-2}$  M, (full spectrum).

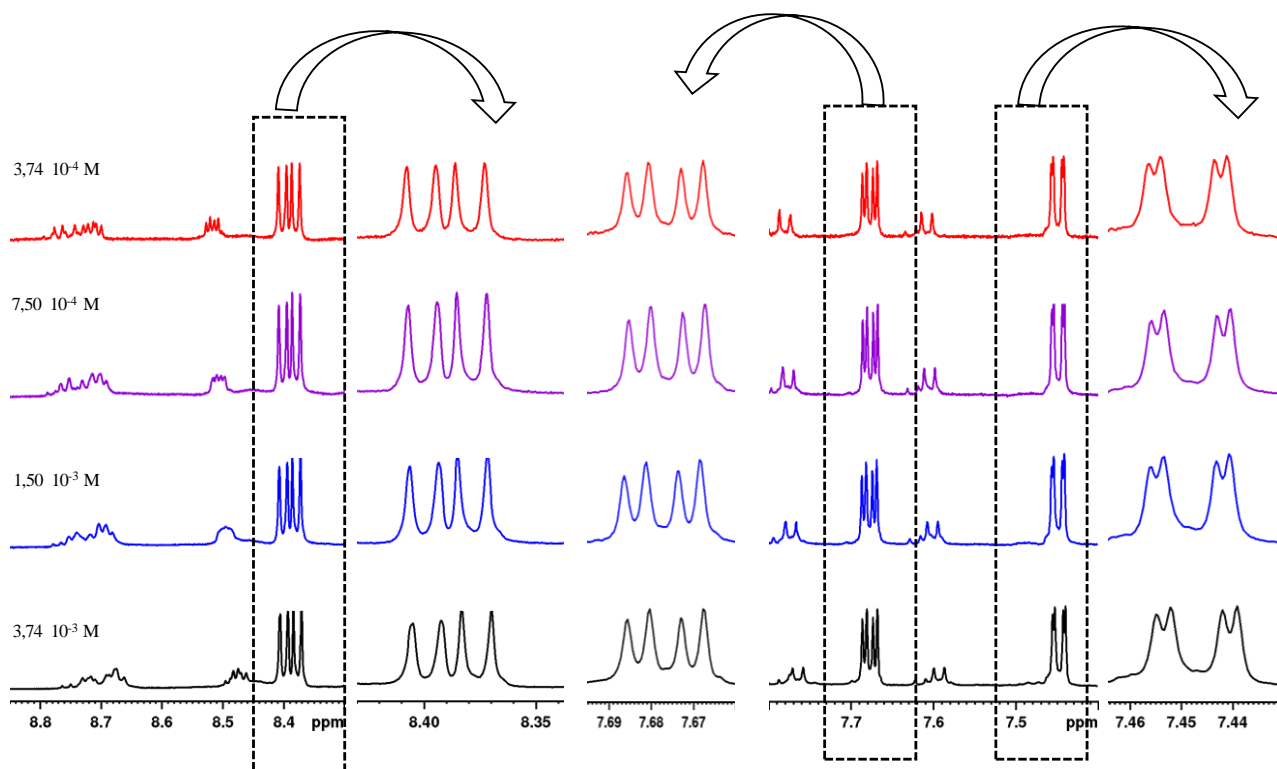

**Fig. S4 ESI.** Variable-concentration <sup>1</sup>H NMR measurement of PDA-CA at 298 K, in DMSO.

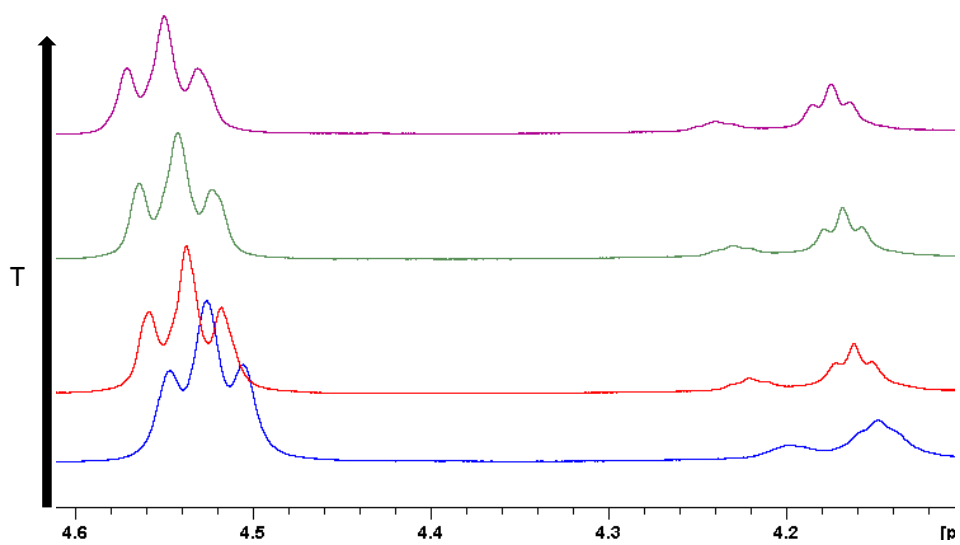

**Fig. S5 ESI.** <sup>1</sup>H NMR spectra of **PDA-CA** methylene signal bonded to N ( $2.1 \cdot 10^{-2}$  M), at variable temperature, in DMSO.

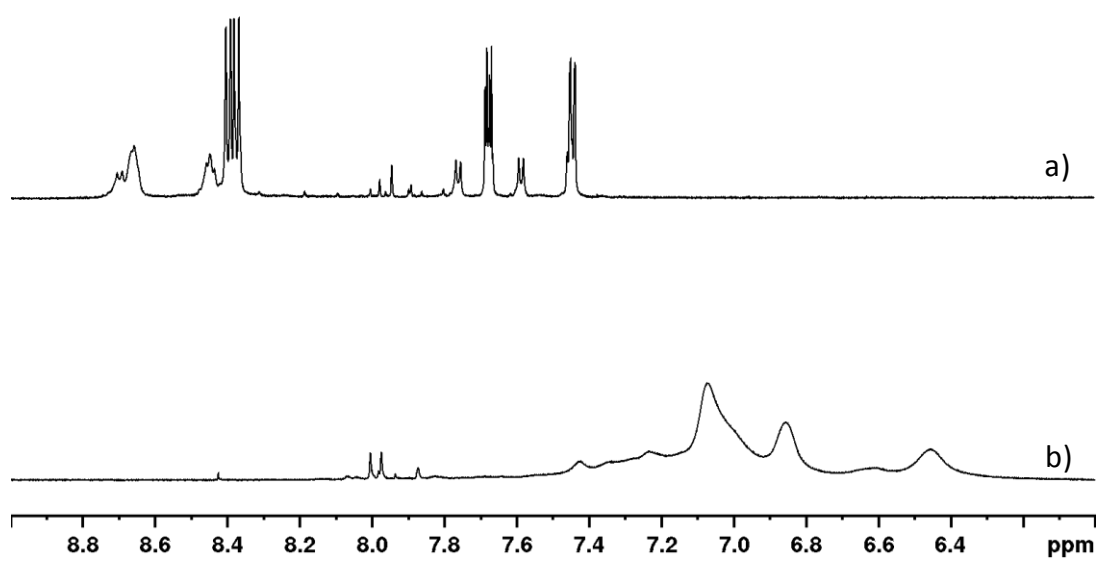

**Fig. S6 ESI.** <sup>1</sup>H NMR spectra of expanded aromatic region of **PDA-CA** ( $7.0 \cdot 10^{-3}$  M), in: a) DMSO; b) D<sub>2</sub>O.

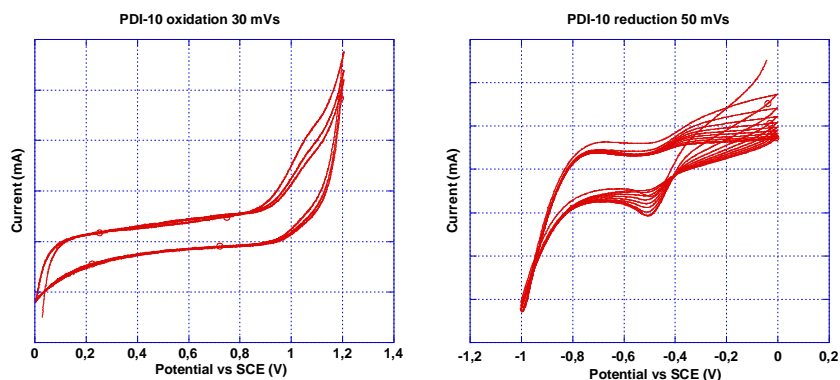

**Fig. S7 ESI.** Cyclic voltammetry of **PDA-CA** in sodium sulfate 0.1M solution

Cyclic voltammetry measurements were performed in solution, under nitrogen atmosphere with a computer controlled Amel 2053 (with Amel 7800 interface) electrochemical workstation in a three electrode single-compartment cell using platinum electrodes and SCE as standard electrode, with Fc/Fc<sup>+</sup> redox couple as internal standard, with a sodium sulfate solution (0.1M) in water at a scan rate of 50 mV·s<sup>-1</sup>.



| Conformation                                              | Gas          | DMSO         | Water        |
|-----------------------------------------------------------|--------------|--------------|--------------|
| <b>syn-a</b>                                              |              |              |              |
| $E_{\text{ele}}$ / hartree                                | -1909.339663 | -1909.380618 | -1909.386761 |
| $H$ / hartree                                             | -1908.738219 | -1908.779984 | -1908.787275 |
|                                                           |              |              |              |
|                                                           |              |              |              |
| <b>syn-b</b>                                              |              |              |              |
| $E_{\text{ele}}$ / hartree                                | -1909.326605 | -1909.371838 | -1909.380860 |
| $H$ / hartree                                             | -1908.726871 | -1908.772009 | -1908.779766 |
|                                                           |              |              |              |
| $\Delta E_{\text{ele}}$ / $\text{kJ}\cdot\text{mol}^{-1}$ | 34.2         | 23.0         | 15.5         |
| $\Delta H$ / $\text{kJ}\cdot\text{mol}^{-1}$              | 29.8         | 20.9         | 19.7         |

| Conformation                                              | Gas          | DMSO         | Water        |
|-----------------------------------------------------------|--------------|--------------|--------------|
| <b>anti-a</b>                                             |              |              |              |
| $E_{\text{ele}}$ / hartree                                | -1909.333988 | -1909.380685 | -1909.387066 |
| $H$ / hartree                                             | -1908.733064 | -1908.779359 | -1908.784021 |
|                                                           |              |              |              |
| <b>anti-b</b>                                             |              |              |              |
| $E_{\text{ele}}$ / hartree                                | -1909.324151 | -1909.368613 | -1909.374316 |
| $H$ / hartree                                             | -1908.724257 | -1908.769820 | -1908.772826 |
|                                                           |              |              |              |
| $\Delta E_{\text{ele}}$ / $\text{kJ}\cdot\text{mol}^{-1}$ | 25.8         | 31.7         | 33.4         |
| $\Delta H$ / $\text{kJ}\cdot\text{mol}^{-1}$              | 23.1         | 25.0         | 29.4         |

**Fig. S8 ESI.** The B3LYP/6-31G(d,p) electronic energies ( $E_{\text{ele}}$ ), enthalpies ( $H$ ) and Gibb's free energies ( $G$ ) calculated for the gas-phase, DMSO and water environment. The energy differences are calculated with respect to the closed conformation.

|                                | Gas            | DMSO           | Water          |
|--------------------------------|----------------|----------------|----------------|
| <b>syn-a</b>                   |                |                |                |
| S <sub>0</sub> →S <sub>1</sub> | 481 nm (0.505) | 492 nm (0.730) | 488 nm (0.743) |
| S <sub>0</sub> →S <sub>2</sub> | 474 nm (0.000) | 436 nm (0.007) | 418 nm (0.003) |
| S <sub>0</sub> →S <sub>3</sub> | 474 nm (0.084) | 436 nm (0.000) | 417 nm (0.000) |
| S <sub>0</sub> →S <sub>4</sub> | 376 nm (0.001) | 366 nm (0.005) | 351 nm (0.011) |
| S <sub>0</sub> →S <sub>5</sub> | 376 nm (0.014) | 363 nm (0.000) | 346 nm (0.004) |
| <b>syn-b</b>                   |                |                |                |
| S <sub>0</sub> →S <sub>1</sub> | 477 nm (0.579) | 489 nm (0.722) | 487 nm (0.735) |
| S <sub>0</sub> →S <sub>2</sub> | 427 nm (0.002) | 401 nm (0.001) | 395 nm (0.001) |
| S <sub>0</sub> →S <sub>3</sub> | 426 nm (0.000) | 401 nm (0.000) | 395 nm (0.000) |
| S <sub>0</sub> →S <sub>4</sub> | 392 nm (0.001) | 379 nm (0.000) | 356 nm (0.000) |
| S <sub>0</sub> →S <sub>5</sub> | 389 nm (0.017) | 377 nm (0.008) | 356 nm (0.004) |

  

| Conformation                   | Gas            | DMSO           | Water          |
|--------------------------------|----------------|----------------|----------------|
| <b>anti-a</b>                  |                |                |                |
| S <sub>0</sub> →S <sub>1</sub> | 473 nm (0.164) | 487 nm (0.780) | 487 nm (0.766) |
| S <sub>0</sub> →S <sub>2</sub> | 473 nm (0.000) | 436 nm (0.001) | 420 nm (0.001) |
| S <sub>0</sub> →S <sub>3</sub> | 472 nm (0.477) | 435 nm (0.002) | 420 nm (0.000) |
| S <sub>0</sub> →S <sub>4</sub> | 378 nm (0.001) | 366 nm (0.000) | 355 nm (0.001) |
| S <sub>0</sub> →S <sub>5</sub> | 374 nm (0.000) | 362 nm (0.001) | 349 nm (0.000) |
| <b>anti-b</b>                  |                |                |                |
| S <sub>0</sub> →S <sub>1</sub> | 469 nm (0.615) | 485 nm (0.735) | 481 nm (0.748) |
| S <sub>0</sub> →S <sub>2</sub> | 422 nm (0.000) | 393 nm (0.000) | 393 nm (0.000) |
| S <sub>0</sub> →S <sub>3</sub> | 422 nm (0.000) | 393 nm (0.000) | 392 nm (0.000) |
| S <sub>0</sub> →S <sub>4</sub> | 378 nm (0.001) | 375 nm (0.000) | 350 nm (0.000) |
| S <sub>0</sub> →S <sub>5</sub> | 377 nm (0.003) | 373 nm (0.002) | 347 nm (0.000) |

**Fig. S9 ESI.** The TD-B3LYP/6-31G(d,p) optical transitions of *syn*- and *anti*-isomers calculated for gas-phase and solvent environments. The values in parentheses stand for the oscillator strengths.

|                          | D(syn-a)       | D(anti-a)      | D(syn/anti-a)  |
|--------------------------|----------------|----------------|----------------|
| $S_0 \rightarrow S_1$    | 559 nm (0.018) | 564 nm (0.027) | 573 nm (0.016) |
| $S_0 \rightarrow S_2$    | 558 nm (0.018) | 553 nm (0.006) | 549 nm (0.022) |
| $S_0 \rightarrow S_3$    | 482 nm (0.349) | 480 nm (0.434) | 480 nm (0.371) |
| $S_0 \rightarrow S_4$    | 482 nm (0.390) | 474 nm (0.323) | 482 nm (0.351) |
| $S_0 \rightarrow S_5$    | 447 nm (0.001) | 427 nm (0.001) | 433 nm (0.001) |
| $S_0 \rightarrow S_6$    | 447 nm (0.002) | 427 nm (0.005) | 428 nm (0.003) |
| $S_0 \rightarrow S_7$    | 438 nm (0.002) | 426 nm (0.001) | 425 nm (0.001) |
| $S_0 \rightarrow S_8$    | 436 nm (0.002) | 426 nm (0.000) | 418 nm (0.000) |
| $S_0 \rightarrow S_9$    | 434 nm (0.000) | 409 nm (0.000) | 416 nm (0.000) |
| $S_0 \rightarrow S_{10}$ | 434 nm (0.000) | 408 nm (0.000) | 413 nm (0.001) |

**Fig. S10 ESI.** The gas-phase TD-B3LYP/6-31G(d,p) optical transitions of model  $\pi$ -dimers. The values in parentheses stand for the oscillator strengths.

$S_0 \rightarrow S_1$ : 2.20 eV / 564 nm,  $f = 0.027$

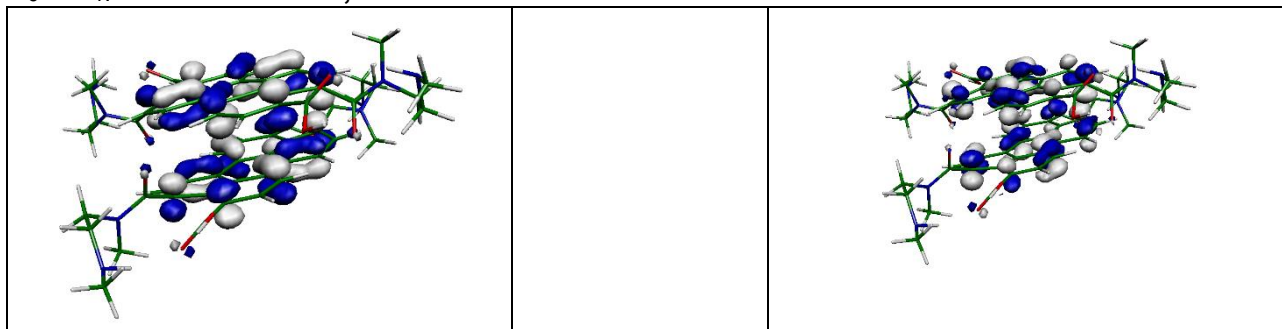

HOMO  $\rightarrow$  LUMO (83%)

$S_0 \rightarrow S_2$ : 2.24 eV / 553 nm,  $f = 0.006$

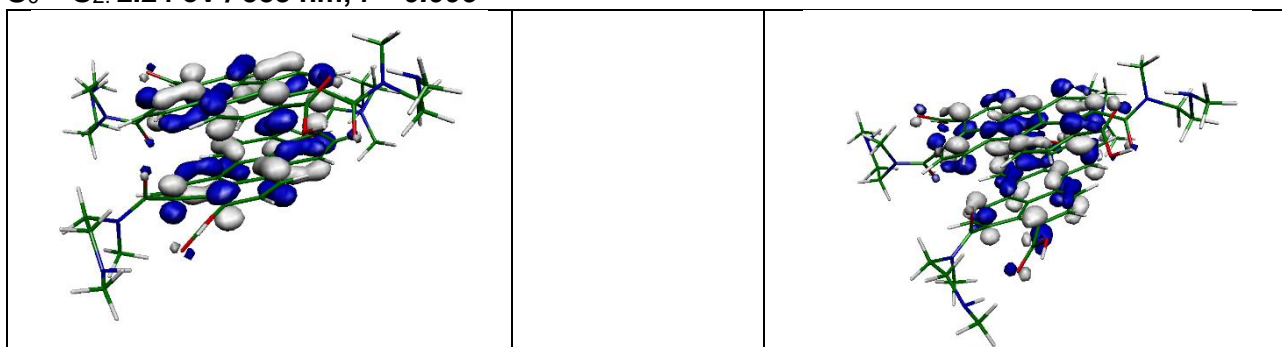

HOMO  $\rightarrow$  LUMO+1 (63%)

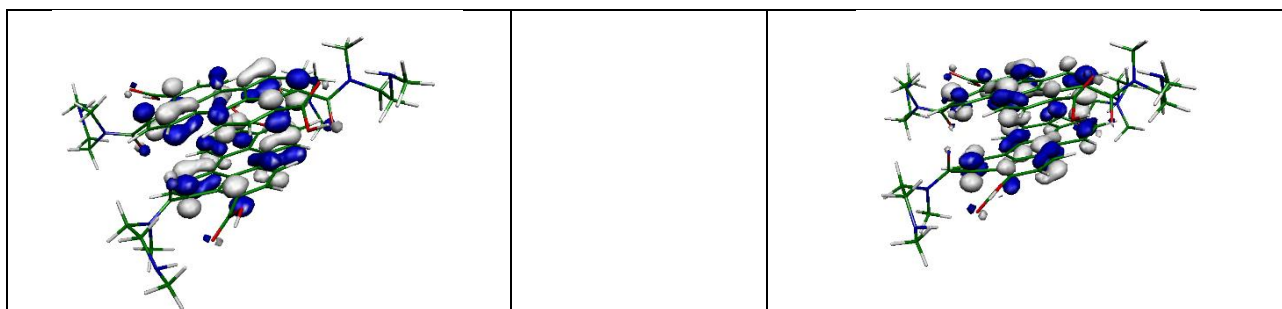

HOMO-1  $\rightarrow$  LUMO (37%)

$S_0 \rightarrow S_3$ : 2.59 eV / 480 nm,  $f = 0.443$

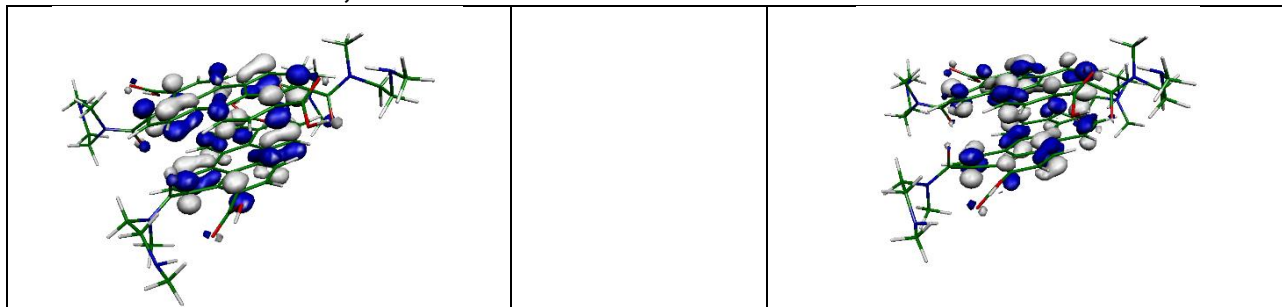

HOMO-1  $\rightarrow$  LUMO (63%)

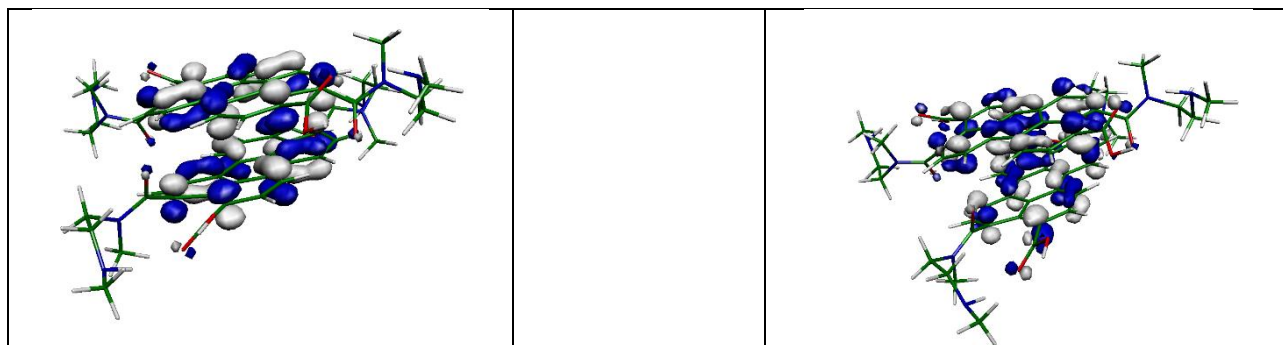

HOMO → LUMO+1 (37%)

$S_0 \rightarrow S_4$ : 2.60 eV / 478 nm,  $f = 0.339$

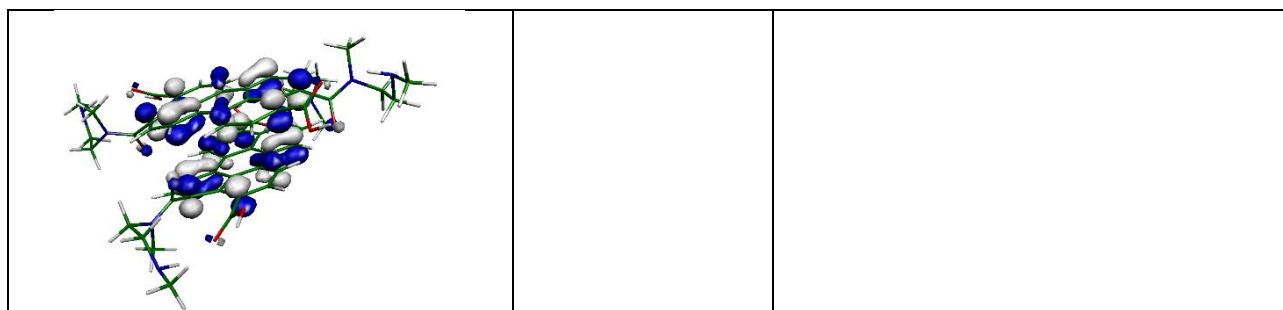

HOMO-1 → LUMO+1 (82%)

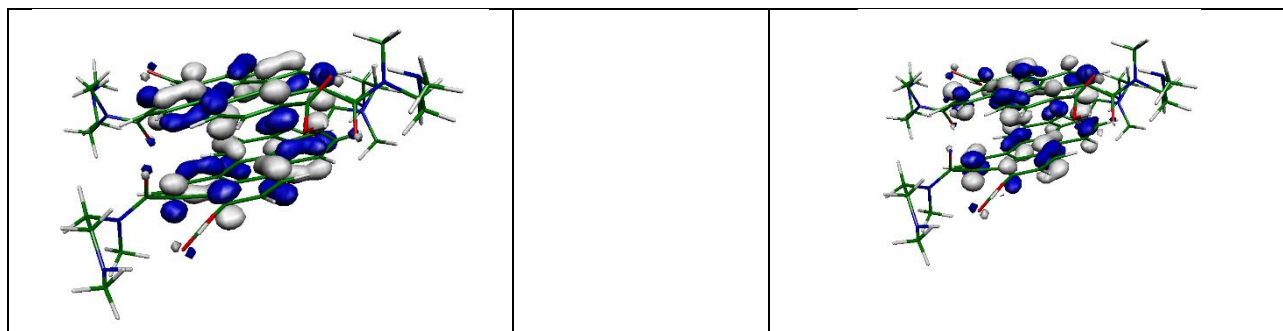

HOMO → LUMO (16%)

**Fig. S11 ESI.** Plots of the B3LYP/6-31G(d,p) molecular orbitals significantly contributing to the first four gas-phase lowest energy TD-B3LYP optical transitions for symmetric **D(anti-a)**  $\pi$ -dimer. The values in parentheses stand for percentages of excitation contributions in individual transitions. The value of the depicted isosurface is  $0.035 \text{ bohr}^{-3/2}$ . The symbol  $f$  denotes oscillator strength.

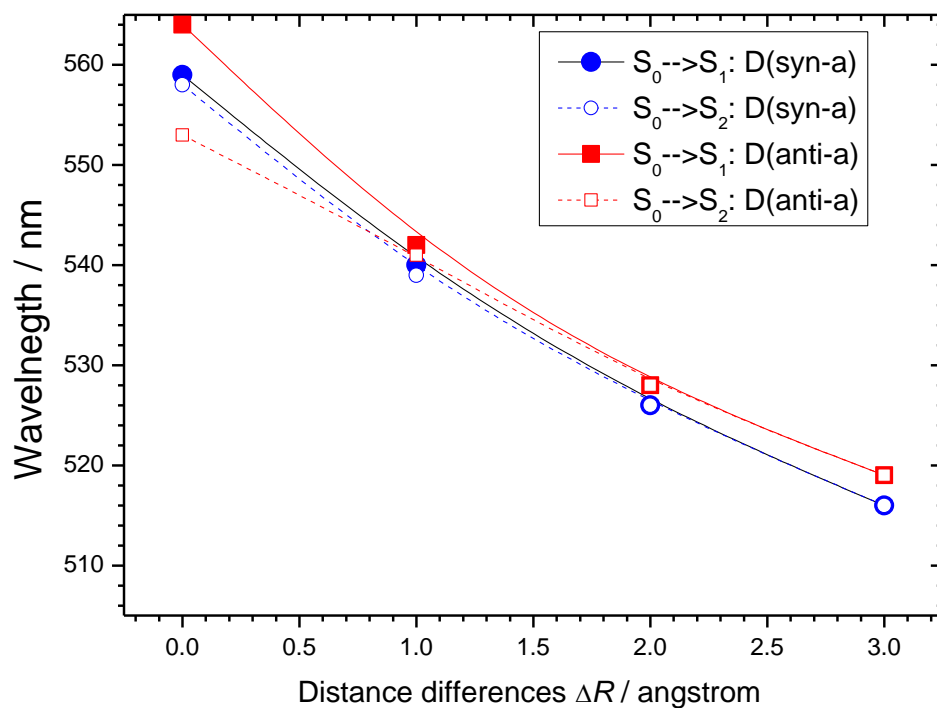

**Fig. S12 ESI.** The dependence of the two lowest gas-phase TD-B3LYP//B3LYP-D/6-31G(d,p) energy optical transitions on the interplane distances displacement of rigid monomers for model **D(syn-a)** (a) and **D(anti-a)** (b)  $\pi$ -dimers. The distance difference  $\Delta R$  is defined with respect to the gas-phase equilibrium interplane distances 3.38 Å for **D(syn-a)** dimer and 3.39 Å for **D(anti-a)** dimer.

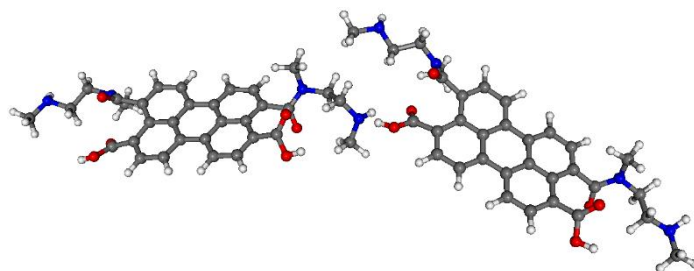

**Fig. S13 ESI.** The B3LYP-D optimal gas-phase geometry of model hydrogen-bonded H-dimer consisting of two *syn-b* molecules.
